# Supplementary material for: Prime editing efficiency and fidelity are enhanced in the absence of mismatch repair
Source: PubMed Central journal article supplement (PMC8828784; doi:10.1038/s41467-022-28442-1), 2022-02-09
Supplement: 41467_2022_28442_MOESM4_ESM.pdf [file 41467_2022_28442_MOESM4_ESM.pdf]

**Title:** Supplementary Data 1

**Description:** Frameshift mutations in collection of 32 knockout HAP1 cell lines, covering all DNA repair pathways.

**Title:** Supplementary Data 2:

**Description:** Sequences of pegRNAs, sgRNAs and primers used throughout the study.
